# Supplementary material
Source: Springer Nature journal article supplement (https://www.springermedizin.de/resource/supplementary/12958_2008_455_MOESM4_ESM.pdf/9567930)

# A. Pbx probe

# B. EMX2 probe

|                               |   |   |   |   |   |   |   |
|-------------------------------|---|---|---|---|---|---|---|
| Unlabeled probe               | + | - | - | - | - | - | - |
| <sup>32</sup> P-labeled probe | + | + | + | + | + | + | + |
| Nuclear extract               | + | - | + | + | + | + | - |
| Anti-Pbx2 Ab                  | - | - | - | + | - | + | + |
| Anti-HOXA7 Ab                 | - | - | - | - | + | + | + |

|                               |   |   |   |   |   |   |   |
|-------------------------------|---|---|---|---|---|---|---|
| Unlabeled probe               | + | - | - | - | - | - | - |
| <sup>32</sup> P-labeled probe | + | + | + | + | + | + | + |
| Nuclear extract               | + | - | + | + | + | + | - |
| Anti-Pbx2 Ab                  | - | - | - | + | - | + | + |
| Anti-HOXA7 Ab                 | - | - | - | - | + | + | + |

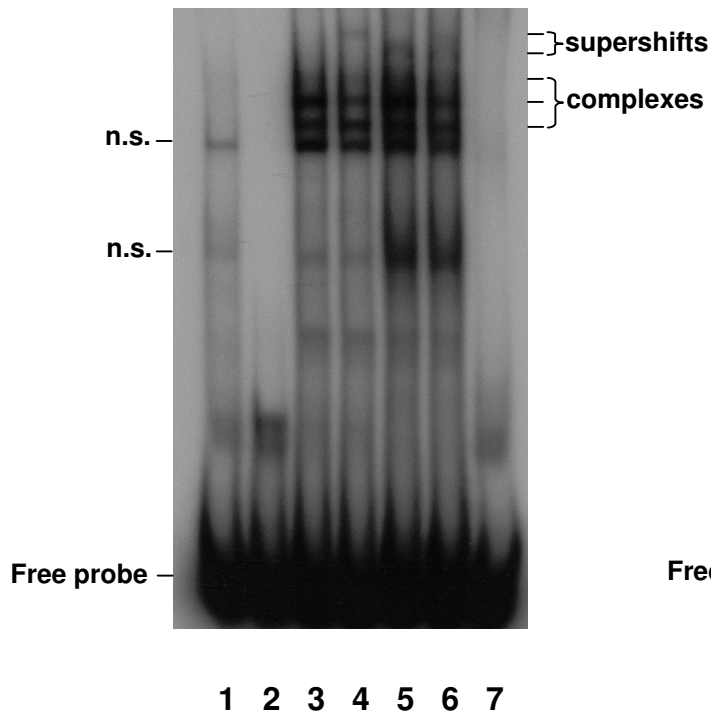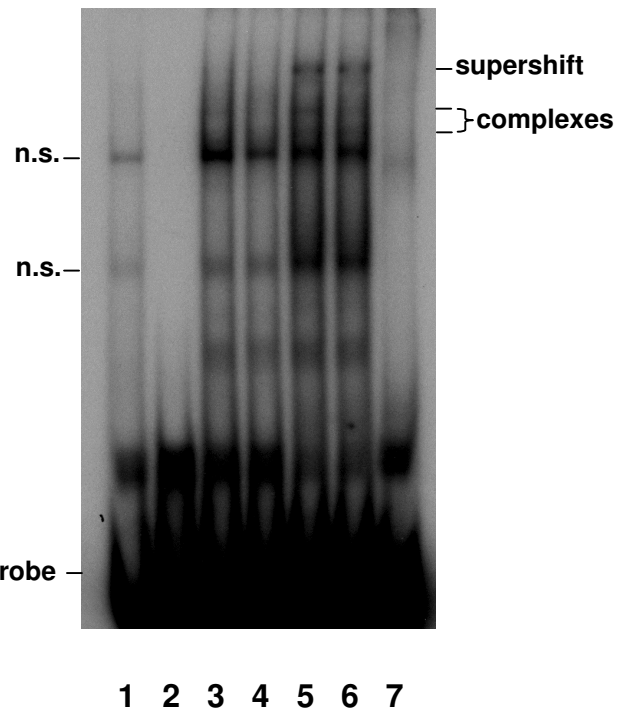

Supplement: MOESM4 [file 9567930]
